# Supplementary material for: Imido transfer of sulfonylimino-λ3-bromane makes possible the synthesis of sulfonylimino-λ3-iodanes
Source: Royal Society of Chemistry journal article supplement (doi:10.1039/b818489e), 2009-01-01
Supplement: b818489e.pdf [file b818489e.pdf]

## Supplementary Information

### **Imido Transfer of Sulfonylimino- $\lambda^3$ -Bromane Makes Possible the Synthesis of Sulfonylimino- $\lambda^3$ -Iodanes**

Masahito Ochiai,<sup>\*a</sup>, Aiko Nakano,<sup>a</sup> Akira Yoshimura,<sup>a</sup> Kazunori Miyamoto,<sup>a</sup>  
Satoko Hayashi<sup>b</sup> and Waro Nakanishi<sup>\*b</sup>

<sup>a</sup> *Graduate School of Pharmaceutical Sciences, University of Tokushima, 1-78  
Shomachi, Tokushima 770-8505, Japan*

<sup>b</sup> *Department of Materials Science and Chemistry, Faculty of Systems Engineering,  
Wakayama University, 930 Sakaedani, Wakayama 640-8510, Japan  
E-mail: mochiai@ph.tokushima-u.ac.jp*

**General Information.** IR spectra were recorded on JASCO FT/IR-420 spectrometers.  $^1\text{H}$  NMR and  $^{13}\text{C}$  NMR spectra were obtained on a JEOL JNM-AL300 or JNM-AL400 spectrometers. Chemical shifts ( $\delta$ ) are reported in parts per million (ppm) downfield from internal  $\text{Me}_4\text{Si}$ . Mass spectra (MS) were obtained on a Waters LCT Premier spectrometer. Melting points were determined with a Yanaco micro melting points apparatus and are uncorrected. Dichloromethane was dried over  $\text{CaH}_2$  and distilled.

**General Procedure for Transimidation of Imino- $\lambda^3$ -Bromane 1 Yielding Sulfonylimino- $\lambda^3$ -Iodanes 2. A Typical Example (Table 1, Entry 1): [N-(Trifluoromethanesulfonyl)imino]-phenyl- $\lambda^3$ -iodane (2a).** To a stirred solution of [N-(trifluoromethanesulfonyl)imino](*p*-trifluoromethylphenyl)- $\lambda^3$ -bromane (**1**)<sup>1</sup> (27.8 mg, 0.075 mmol) in dichloromethane (1 mL) was added iodobenzene (18.4 mg, 0.09 mmol) at room temperature under argon and the mixture was stirred for 1 h. After evaporation under an aspirator vacuum, repeated decantation of the crude reaction mixture with dichloromethane gave (trifluoromethanesulfonyl)imino- $\lambda^3$ -iodane **2a** (25.3 mg, 97%).<sup>2</sup> White powder; mp 214-217 °C; IR (KBr) 1631, 1284, 1176, 1132, 976, 648, 602  $\text{cm}^{-1}$ ;  $^1\text{H}$  NMR (400 MHz,  $\text{CD}_3\text{CN}$ )  $\delta$  8.11 (d,  $J = 7.2$  Hz, 2H), 7.71 (t,  $J = 7.2$  Hz, 1H), 7.57 (t,  $J = 7.2$  Hz, 2H); HRMS (ESI, positive) calcd for  $\text{C}_9\text{H}_8\text{F}_3\text{IN}_2\text{NaO}_2\text{S}$  [(M+MeCN+Na)<sup>+</sup>] 414.9201, found 414.9226. Anal. Calcd for  $\text{C}_7\text{H}_5\text{F}_3\text{INO}_2\text{S}$ : C, 23.95; H, 1.44; N, 3.99. Found: C, 23.81; H, 1.62; N, 4.31.

**[N-(Trifluoromethanesulfonyl)imino](2-methylphenyl)- $\lambda^3$ -iodane (2b):** white powder; mp 119-121 °C; IR (KBr) 1635, 1284, 1182, 1132, 976, 652, 598  $\text{cm}^{-1}$ ;  $^1\text{H}$  NMR (400 MHz,  $\text{CD}_3\text{CN}$ )  $\delta$  8.16 (d,  $J = 7.2$  Hz, 1H), 7.62 (t,  $J = 7.2$  Hz, 1H), 7.54 (d,  $J = 7.2$  Hz, 1H), 7.32 (t,  $J = 7.2$  Hz, 1H), 2.69 (s, 3H);  $^{13}\text{C}$  NMR (75 MHz,  $\text{CD}_3\text{CN}$ )  $\delta$  142.7, 138.5, 134.8, 132.2, 129.9, 123.8, 121.8 (q,  $^1J_{\text{CF}} = 324.5$  Hz), 25.2; HRMS (ESI, positive) calcd for  $\text{C}_{10}\text{H}_{10}\text{F}_3\text{IN}_2\text{NaO}_2\text{S}$  [(M+MeCN+Na)<sup>+</sup>] 428.9358, found 428.9319. Anal. Calcd for  $\text{C}_8\text{H}_7\text{F}_3\text{INO}_2\text{S}$ : C, 26.32; H, 1.93; N, 3.84. Found: C, 26.43; H, 2.14; N, 3.74.

**[N-(Trifluoromethanesulfonyl)imino](4-methylphenyl)- $\lambda^3$ -iodane (2c):** white powder; mp 181-184 °C; IR (KBr) 1631, 1282, 1173, 1130, 970, 648, 596  $\text{cm}^{-1}$ ;  $^1\text{H}$  NMR (400 MHz,  $\text{DMSO}-d_6$ )  $\delta$  7.96 (d,  $J = 7.4$  Hz, 2H), 7.34 (d,  $J = 7.4$  Hz, 2H), 2.40 (s, 3H); HRMS (ESI, positive) calcd for  $\text{C}_{10}\text{H}_{10}\text{F}_3\text{IN}_2\text{NaO}_2\text{S}$  [(M+MeCN+Na)<sup>+</sup>] 428.9358, found 428.9339. Anal. Calcd for  $\text{C}_8\text{H}_7\text{F}_3\text{INO}_2\text{S}$ : C, 26.32; H, 1.93; N, 3.84. Found: C, 26.39; H, 2.10; N, 3.71.

**[N-(Trifluoromethanesulfonyl)imino](4-methoxyphenyl)- $\lambda^3$ -iodane (2d):** white powder; mp 115-117 °C; IR (KBr) 1587, 1487, 1456, 1275, 1167, 1124, 987, 658, 598  $\text{cm}^{-1}$ ;  $^1\text{H}$  NMR (400 MHz, acetone- $d_6$ )  $\delta$  8.14 (d,  $J = 7.2$  Hz, 2H), 7.12 (d,  $J = 7.2$  Hz, 2H), 3.93 (s, 3H); HRMS (ESI, positive) calcd for  $\text{C}_{10}\text{H}_{10}\text{F}_3\text{IN}_2\text{NaO}_3\text{S}$  [(M+MeCN+Na)<sup>+</sup>] 444.9307, found 444.9269. Anal. Calcd for  $\text{C}_8\text{H}_7\text{F}_3\text{INO}_3\text{S}$ : C, 25.21; H, 1.85; N, 3.68. Found: C, 25.09; H, 1.99; N, 3.63.

**[N-(Trifluoromethanesulfonyl)imino](4-fluorophenyl)- $\lambda^3$ -iodane (2e):**<sup>2</sup> white powder; mp 229-231 °C; IR (KBr) 1630, 1275, 1161, 1124, 987, 650, 604  $\text{cm}^{-1}$ ;  $^1\text{H}$  NMR (400 MHz,  $\text{DMSO}-d_6$ )

$\delta$  8.20-8.10 (m, 2H), 7.46-7.36 (m, 2H); HRMS (ESI, positive) calcd for  $C_9H_7F_4IN_2NaO_2S$  [(M+MeCN+Na)<sup>+</sup>] 432.9107, found 432.9099. Anal. Calcd for  $C_7H_4F_4INO_2S$ : C, 22.78; H, 1.09; N, 3.80. Found: C, 22.54; H, 1.23; N, 4.17.

**[N-(Trifluoromethanesulfonyl)imino](4-chlorophenyl)- $\lambda^3$ -iodane (2f)**: pale yellow powder; mp 224-226 °C; IR (KBr) 1624, 1468, 1275, 1213, 1165, 1124, 987, 806, 658, 606  $cm^{-1}$ ; <sup>1</sup>H NMR (400 MHz, acetone-*d*<sub>6</sub>)  $\delta$  8.22 (d, *J* = 8.7 Hz, 2H), 7.66 (d, *J* = 8.7 Hz, 2H); HRMS (ESI, positive) calcd for  $C_9H_7ClF_3IN_2NaO_2S$  [(M+MeCN+Na)<sup>+</sup>] 448.8811, found 448.8831.

**[N-(Trifluoromethanesulfonyl)imino](4-bromophenyl)- $\lambda^3$ -iodane (2g)**: white powder; mp 224-226 °C; IR (KBr) 1620, 1469, 1275, 1163, 1126, 987, 804, 656, 606  $cm^{-1}$ ; <sup>1</sup>H NMR (400 MHz, acetone-*d*<sub>6</sub>)  $\delta$  8.14 (d, *J* = 8.0 Hz, 2H), 7.82 (d, *J* = 8.0 Hz, 2H); HRMS (ESI, positive) calcd for  $C_9H_7^{79}BrF_3IN_2NaO_2S$  [(M+MeCN+Na)<sup>+</sup>] 492.8306, found 492.8296. Anal. Calcd for  $C_7H_4BrF_3INO_2S$ : C, 19.55; H, 0.94; N, 3.26. Found: C, 19.72; H, 1.18; N, 3.18.

**[N-(Trifluoromethanesulfonyl)imino][4-(trifluoromethyl)phenyl]- $\lambda^3$ -iodane (2h)**: white powder; mp 204-206 °C; IR (KBr) 1626, 1282, 1180, 1132, 970, 650, 600  $cm^{-1}$ ; <sup>1</sup>H NMR (400 MHz, acetone-*d*<sub>6</sub>)  $\delta$  8.42 (d, *J* = 8.0 Hz, 2H), 7.98 (d, *J* = 8.0 Hz, 2H); HRMS (ESI, positive) calcd for  $C_8H_4F_6INNaO_2S$  [(M+Na)<sup>+</sup>] 441.8809, found 441.8832; calcd for  $C_9H_8F_6INNaO_3S$  [(M+MeOH+Na)<sup>+</sup>] 473.9072, found 473.9057. Anal. Calcd for  $C_8H_4F_6INO_2S$ : C, 22.93; H, 0.96; N, 3.34. Found: C, 23.14; H, 1.23; N, 3.51.

**[N-(Trifluoromethanesulfonyl)imino](4-cyanophenyl)- $\lambda^3$ -iodane (2i)**: white powder; mp 166-168 °C; IR (KBr) 2227, 1624, 1579, 1475, 1392, 1282, 1176, 976, 818, 648, 594  $cm^{-1}$ ; <sup>1</sup>H NMR (400 MHz, acetone-*d*<sub>6</sub>)  $\delta$  8.39 (d, *J* = 8.1 Hz, 2H), 8.04 (d, *J* = 8.1 Hz, 2H); HRMS (ESI, positive) calcd for  $C_{10}H_7F_3IN_3NaO_2S$  [(M+MeCN+Na)<sup>+</sup>] 439.9154, found 439.9146. Anal. Calcd for  $C_8H_4F_3IN_2O_2S$ : C, 25.55; H, 1.07; N, 7.45. Found: C, 25.83; H, 1.28; N, 7.47.

**[N-(Trifluoromethanesulfonyl)imino][4-(ethoxycarbonyl)phenyl]- $\lambda^3$ -iodane (2j)**: white powder; mp 220-221 °C; IR (KBr) 2985, 1714, 1635, 1587, 1394, 1369, 1286, 1207, 1174, 1133, 1009, 978, 847, 754, 646, 596  $cm^{-1}$ ; <sup>1</sup>H NMR (400 MHz, acetone-*d*<sub>6</sub>)  $\delta$  8.32 (d, *J* = 7.6 Hz, 2H), 8.17 (d, *J* = 7.6 Hz, 2H), 4.41 (q, *J* = 7.2 Hz, 2H), 1.40 (t, *J* = 7.2 Hz, 3H); HRMS (ESI, positive) calcd for  $C_{11}H_{13}F_3INNaO_5S$  [(M+MeOH+Na)<sup>+</sup>] 477.9409, found 477.9453. Anal. Calcd for  $C_{10}H_9F_3INO_4S$ : C, 28.38; H, 2.14; N, 3.31. Found: C, 28.37; H, 2.28; N, 3.24.

**[N-(Trifluoromethanesulfonyl)imino][2-(acetyl)phenyl]- $\lambda^3$ -iodane (2k)**: colorless prisms (recrystallized from dichloromethane–hexane); mp 101-102 °C; IR (nujol) 1631, 1576, 1309, 1292, 1173, 1119, 953, 781, 642, 602  $cm^{-1}$ ; <sup>1</sup>H NMR (400 MHz, CD<sub>3</sub>CN)  $\delta$  8.49 (d, *J* = 8.1 Hz, 1H), 8.37 (d, *J* = 8.1 Hz, 1H), 8.15 (m, 1H), 7.92 (m, 1H), 2.88 (s, 3H); <sup>13</sup>C NMR (75 MHz, CD<sub>2</sub>Cl<sub>2</sub>)  $\delta$  202.6, 138.2, 134.2, 131.9, 131.7, 127.3, 121.5 (q, <sup>1</sup>*J*<sub>CF</sub> = 324.5 Hz), 117.6, 25.7. Anal. Calcd for  $C_9H_7F_3INO_3S \cdot 1/2H_2O$ : C, 26.88; H, 2.01; N, 3.48. Found: C, 26.95; H, 1.96; N, 3.69.

**[N-(Trifluoromethanesulfonyl)imino](2,2,2-trifluoroethyl)- $\lambda^3$ -iodane (3)**: white powder;

mp 161 °C; IR (KBr) 1626, 1282, 1182, 1132, 974, 756, 650, 600 cm<sup>-1</sup>; <sup>1</sup>H NMR (400 MHz, acetone-*d*<sub>6</sub>) δ 5.06 (q, <sup>3</sup>J<sub>HF</sub> = 10.9 Hz, 2H); HRMS (ESI, positive) calcd for C<sub>5</sub>H<sub>5</sub>F<sub>6</sub>IN<sub>2</sub>NaO<sub>2</sub>S [(M+MeCN+Na)<sup>+</sup>] 420.8918, found 420.8926.

**1-(Trifluoromethanesulfonylamido)-1,2-benziodoxol-3(1H)-one (6):** white powder; mp 194 °C; IR (KBr) 3095, 1666, 1630, 1568, 1371, 1292, 1232, 1200, 1124, 926, 831, 746 cm<sup>-1</sup>; <sup>1</sup>H NMR (400 MHz, CD<sub>3</sub>CN) δ 8.16 (dd, *J* = 8.1, 1.5 Hz, 1H), 8.08-7.99 (m, 2H), 7.82 (ddd, *J* = 9.1, 6.6, 1.5 Hz, 1H); HRMS (ESI, positive) calcd for C<sub>10</sub>H<sub>8</sub>F<sub>3</sub>IN<sub>2</sub>NaO<sub>4</sub>S [(M+MeCN+Na)<sup>+</sup>] 458.9099, found 458.9091. Anal. Calcd for C<sub>8</sub>H<sub>5</sub>F<sub>3</sub>INO<sub>4</sub>S: C, 24.32; H, 1.28; N, 3.55. Found: C, 24.32; H, 1.50; N, 3.88.

**[N-(Trifluoromethanesulfonyl)imino](2-carbamoylphenyl)-λ<sup>3</sup>-iodane (8a):** colorless prisms (recrystallized from methanol–water); mp 87-93 °C; IR (KBr) 3384, 3228, 2744, 1664, 1587, 1545, 1441, 1319, 1300, 1211, 1151, 1130, 966, 741, 607 cm<sup>-1</sup>; <sup>1</sup>H NMR (400 MHz, acetone-*d*<sub>6</sub>) δ 8.43 (d, *J* = 7.2 Hz, 1H), 8.34 (d, *J* = 7.2 Hz, 1H), 8.10 (br t, *J* = 7.2 Hz, 1H), 7.87 (br t, *J* = 7.2 Hz, 1H); HRMS (ESI, positive) calcd for C<sub>10</sub>H<sub>9</sub>F<sub>3</sub>IN<sub>3</sub>NaO<sub>3</sub>S [(M+MeCN+Na)<sup>+</sup>] 457.9259, found 457.9278. Anal. Calcd for C<sub>8</sub>H<sub>6</sub>F<sub>3</sub>IN<sub>2</sub>O<sub>3</sub>S: C, 24.38; H, 1.53; N, 7.11. Found: C, 24.24; H, 1.70; N, 7.40.

**[N-(Trifluoromethanesulfonyl)imino](2-carbamoyl-4-methylphenyl)-λ<sup>3</sup>-iodane (8b):** pale yellow powder; mp 135-139 °C; IR (KBr) 3352, 3205, 1660, 1558, 1452, 1387, 1294, 1180, 1122, 958, 652, 606 cm<sup>-1</sup>; <sup>1</sup>H NMR (400 MHz, acetone-*d*<sub>6</sub>) δ 8.25 (s, 1H), 8.17 (d, *J* = 9.1 Hz, 1H), 7.92 (d, *J* = 9.1 Hz, 1H), 2.56 (s, 3H); HRMS (ESI, positive) calcd for C<sub>9</sub>H<sub>8</sub>F<sub>3</sub>IN<sub>2</sub>NaO<sub>3</sub>S [(M+Na)<sup>+</sup>] 430.9150, found 430.9159.

## References

- 1 M. Ochiai, T. Kaneaki, N. Tada, K. Miyamoto, H. Chuman, M. Shiro, S. Hayashi and W. Nakanishi, *J. Am. Chem. Soc.*, 2007, **129**, 12938.
- 2 L. M. Yagupolskii, V. I. Popov, N. V. Pavlenko, I. I. Maletina, A. A. Mironova, R. Yu. Gavrilova and V. V. Orda, *Zh. Org. Khim. USSR*, 1986, **22**, 2169.

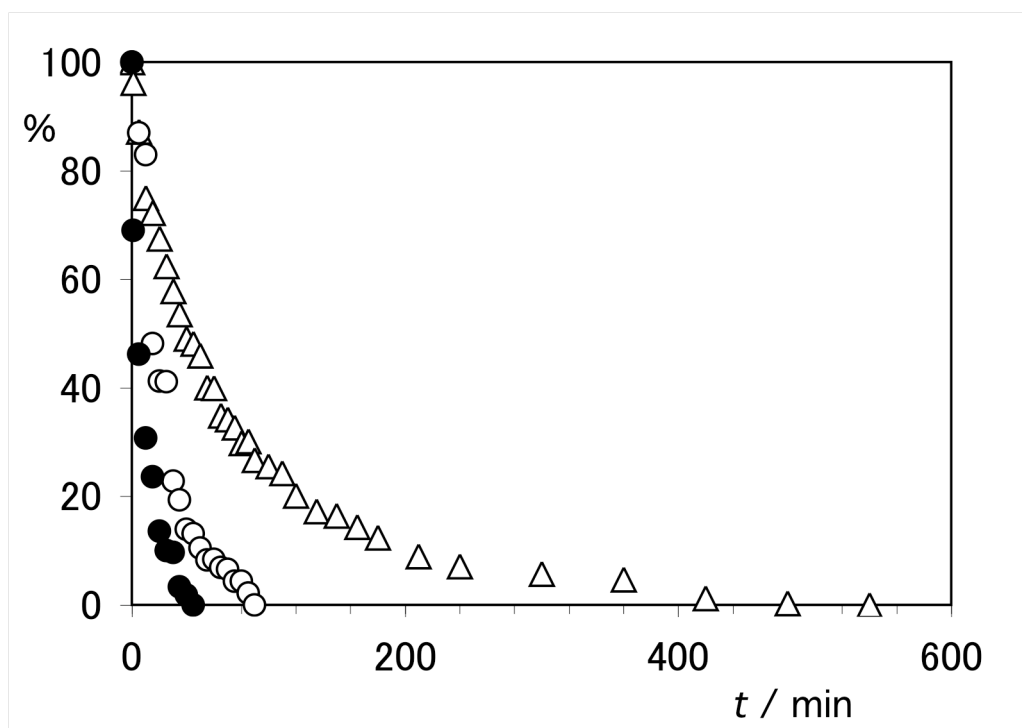

**Fig.** Time-course for transimidation to PhI with the  $\lambda^3$ -bromane **1** (0.05 M) in MeCN- $d_3$  at 23 °C under argon: decrease (%) of **1** was evaluated by  $^1\text{H}$  NMR. Concentration of PhI: ( $\Delta$ ) 0.05 M, ( $\circ$ ) 0.125 M, ( $\bullet$ ) 0.25 M.

## X-ray Data for 2k

### A. Crystal Data: Empirical Formula (C<sub>9</sub>H<sub>7</sub>F<sub>3</sub>INO<sub>3</sub>S), Formula Weight (393.12)

|                      |                                                                                      |
|----------------------|--------------------------------------------------------------------------------------|
| Crystal Color, Habit | colorless, prism                                                                     |
| Crystal Dimensions   | 0.30 X 0.30 X 0.20 mm                                                                |
| Crystal System       | orthorhombic                                                                         |
| Lattice Type         | Primitive                                                                            |
| Indexing Images      | 3 oscillations @ 90.0 seconds                                                        |
| Detector Position    | 127.40 mm                                                                            |
| Pixel Size           | 0.100 mm                                                                             |
| Lattice Parameters   | a = 10.1845(3) Å, b = 19.9169(5) Å, c = 5.9157(2) Å<br>V = 1199.96(6) Å <sup>3</sup> |
| Space Group          | Pna2 <sub>1</sub> (No. 33)                                                           |
| Z value              | 4                                                                                    |
| D <sub>calc</sub>    | 2.176 g/cm <sup>3</sup>                                                              |
| F <sub>000</sub>     | 752.00                                                                               |
| μ(MoKα)              | 28.814 cm <sup>-1</sup>                                                              |

### B. Intensity Measurements

|                                       |                                                                          |
|---------------------------------------|--------------------------------------------------------------------------|
| Diffractionmeter                      | Rigaku RAXIS-RAPID                                                       |
| Radiation                             | MoKα (λ = 0.71075 Å), graphite monochromated                             |
| Detector Aperture                     | 280 mm x 256 mm                                                          |
| Data Images                           | 41 exposures                                                             |
| ω oscillation Range (χ=45.0, φ=0.0)   | 130.0 - 190.0°                                                           |
| Exposure Rate                         | 180.0 sec./°                                                             |
| ω oscillation Range (χ=45.0, φ=180.0) | 0.0 - 160.0°                                                             |
| Exposure Rate                         | 180.0 sec./°                                                             |
| Detector Position                     | 127.40 mm                                                                |
| Pixel Size                            | 0.100 mm                                                                 |
| 2θ <sub>max</sub>                     | 54.8°                                                                    |
| No. of Reflections Measured           | Total: 10881, Unique: 10360 (R <sub>int</sub> = 0.023)                   |
| Corrections                           | Lorentz-polarization, Absorption (transmission factors: 0.8930 - 0.9459) |

### C. Structure Solution and Refinement

|                                    |                                     |
|------------------------------------|-------------------------------------|
| Structure Solution                 | Direct Methods (SIR92)              |
| Refinement                         | Full-matrix least-squares on F      |
| Function Minimized                 | Σ w (IFoI - IFcI) <sup>2</sup>      |
| Least Squares Weights              | 1                                   |
| 2θ <sub>max</sub> cutoff           | 54.8°                               |
| Anomalous Dispersion               | All non-hydrogen atoms              |
| No. Observations (All reflections) | 2720                                |
| No. Variables                      | 165                                 |
| Reflection/Parameter Ratio         | 16.48                               |
| Residuals: R (All reflections)     | 0.0157                              |
| Residuals: R1 (I > 2.00σ(I))       | 0.0154                              |
| Residuals: wR2 (All reflections)   | 0.0379                              |
| Goodness of Fit Indicator          | 1.080                               |
| Max Shift/Error in Final Cycle     | 0.002                               |
| Maximum peak in Final Diff. Map    | 0.63 e <sup>-</sup> /Å <sup>3</sup> |
| Minimum peak in Final Diff. Map    | 0 e <sup>-</sup> /Å <sup>3</sup>    |

## X-ray Data for 8a

### A. Crystal Data: Empirical Formula (C<sub>8</sub>H<sub>6</sub>F<sub>3</sub>IN<sub>2</sub>O<sub>3</sub>S), Formula Weight (394.11)

|                      |                                                                                        |
|----------------------|----------------------------------------------------------------------------------------|
| Crystal Color, Habit | colorless, prism                                                                       |
| Crystal Dimensions   | 0.20 X 0.20 X 0.20 mm                                                                  |
| Crystal System       | orthorhombic                                                                           |
| Lattice Type         | Primitive                                                                              |
| Indexing Images      | 3 oscillations @ 180.0 seconds                                                         |
| Detector Position    | 127.40 mm                                                                              |
| Pixel Size           | 0.100 mm                                                                               |
| Lattice Parameters   | a = 11.1853(4) Å, b = 14.2294(4) Å, c = 14.5837(4) Å<br>V = 2321.14(12) Å <sup>3</sup> |
| Space Group          | P2 <sub>1</sub> 2 <sub>1</sub> 2 <sub>1</sub> (No. 19)                                 |
| Z value              | 8                                                                                      |
| D <sub>calc</sub>    | 2.255 g/cm <sup>3</sup>                                                                |
| F <sub>000</sub>     | 1504.00                                                                                |
| μ(MoKα)              | 29.818 cm <sup>-1</sup>                                                                |

### B. Intensity Measurements

|                                       |                                                                        |
|---------------------------------------|------------------------------------------------------------------------|
| Diffractometer                        | Rigaku RAXIS-RAPID                                                     |
| Radiation                             | MoKα (λ = 0.71075 Å), graphite monochromated                           |
| Detector Aperture                     | 280 mm x 256 mm                                                        |
| Data Images                           | 44 exposures                                                           |
| ω oscillation Range (χ=45.0, φ=130.0) | 130.0 - 190.0°                                                         |
| Exposure Rate                         | 150.0 sec./°                                                           |
| ω oscillation Range (χ=45.0, φ=310.0) | 0.0 - 160.0°                                                           |
| Exposure Rate                         | 150.0 sec./°                                                           |
| Detector Position                     | 127.40 mm                                                              |
| Pixel Size                            | 0.100 mm                                                               |
| 2θ <sub>max</sub>                     | 54.9°                                                                  |
| No. of Reflections Measured           | Total: 22608, Unique: 22562 (R <sub>int</sub> = 0.030)                 |
| Corrections                           | Lorentz-polarization, Absorption (transmission factors: 0.536 - 0.551) |

### C. Structure Solution and Refinement

|                                    |                                     |
|------------------------------------|-------------------------------------|
| Structure Solution                 | Direct Methods (SIR92)              |
| Refinement                         | Full-matrix least-squares on F      |
| Function Minimized                 | Σ w (IFoI - IFcI) <sup>2</sup>      |
| Least Squares Weights              | 1                                   |
| 2θ <sub>max</sub> cutoff           | 54.9°                               |
| Anomalous Dispersion               | All non-hydrogen atoms              |
| No. Observations (All reflections) | 5281                                |
| No. Variables                      | 326                                 |
| Reflection/Parameter Ratio         | 16.20                               |
| Residuals: R (All reflections)     | 0.0223                              |
| Residuals: R1 (I > 2.00σ(I))       | 0.0215                              |
| Residuals: wR2 (All reflections)   | 0.0520                              |
| Goodness of Fit Indicator          | 1.087                               |
| Max Shift/Error in Final Cycle     | 0.002                               |
| Maximum peak in Final Diff. Map    | 1.96 e <sup>-</sup> /Å <sup>3</sup> |
| Minimum peak in Final Diff. Map    | 0 e <sup>-</sup> /Å <sup>3</sup>    |
